# Supplementary material
Source: PubMed Central journal article supplement (PMC4537113)
Supplement: nn5b00061_si_001.pdf [file nn5b00061_si_001.pdf]

# Supporting Information

## Enzymatically Active Microgels from Self-Assembling Protein Nanofibrils for Microflow Chemistry

Xiao-Ming Zhou,<sup>†,‡,⊥</sup> Ulyana Shimanovich,<sup>§,‡</sup> Therese W. Herling,<sup>§</sup> Si Wu,<sup>†</sup>  
Christopher M. Dobson,<sup>§</sup> Tuomas P. J. Knowles,<sup>\*,§</sup> Sarah Perrett<sup>\*,†</sup>

<sup>†</sup>National Laboratory of Biomacromolecules, Institute of Biophysics, Chinese Academy of Sciences, 15 Datun Road, Chaoyang District, Beijing 100101, China.

<sup>§</sup>Department of Chemistry, University of Cambridge, Lensfield Road, Cambridge CB2 1EW, UK.

<sup>⊥</sup>University of the Chinese Academy of Sciences, 19A Yuquan Road, Shijingshan District, Beijing 100049, China.

### Corresponding Authors

\* E-mail: sarah.perrett@cantab.net; tpjk2@cam.ac.uk

### Author Contributions

<sup>‡</sup>These authors contributed equally.

### Supplementary Video Files S1 and S2.

Encapsulation of Ure2-AP droplets in microfluidic droplet-making device. The video was resolved from light microscopy images using a high speed camera (Phantom camera v611, Vision research, 700k fps).

**S1:** Video of droplet formation at the T-junction of the microfluidic channel, corresponding to Figure 1b *upper panel*.

**S2:** Video of droplets inside the microfluidic channel, corresponding to Figure 1b *lower panel*.
